# Supplementary material for: Assessment of Nitrate Removal Capacity of Two Selected Eukaryotic Green Microalgae
Source: MDPI journal article supplement (doi:10.3390/cells10092490), 2021-09-20
Supplement: s1 [file s1]

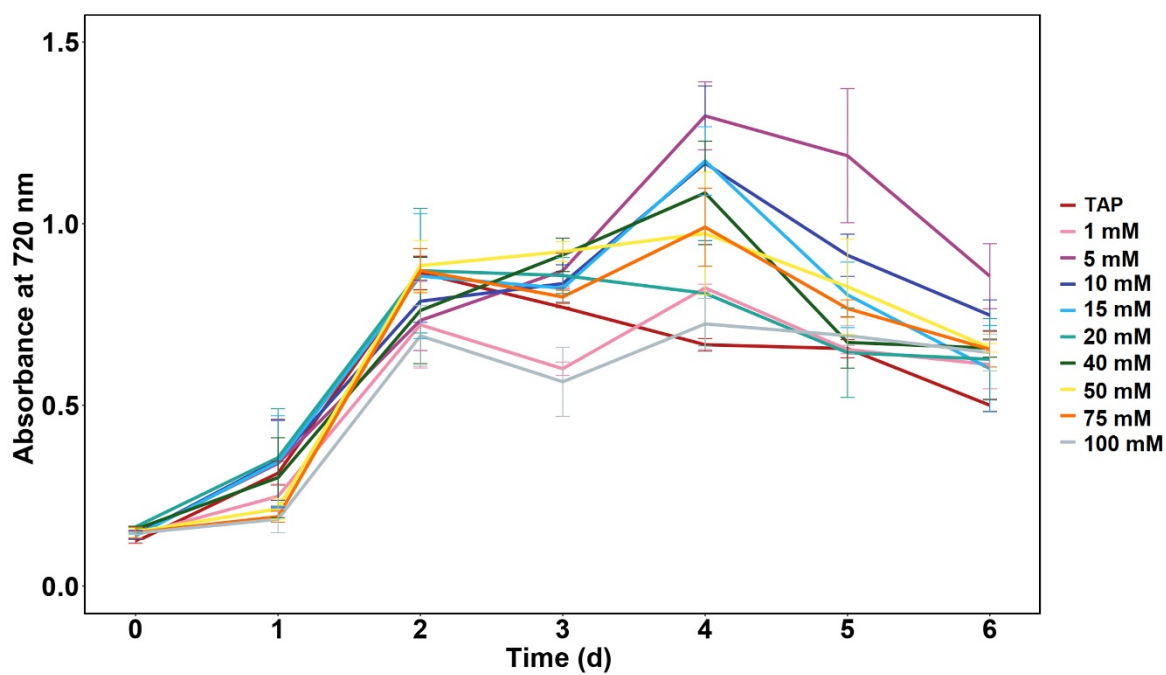

(a)

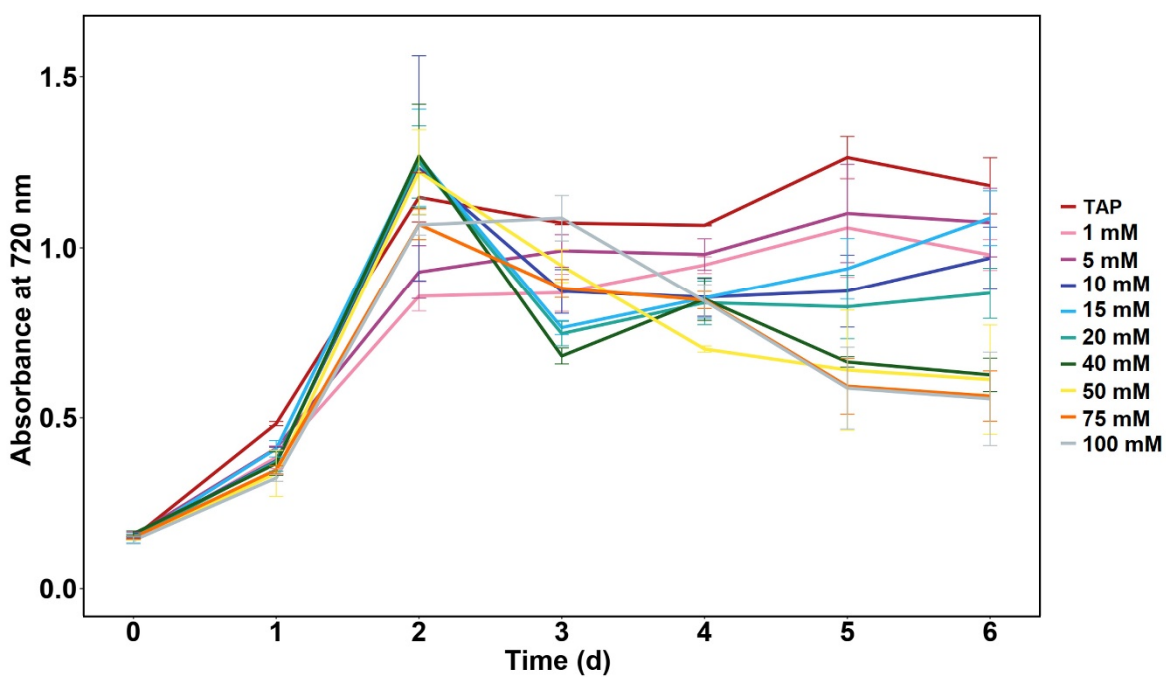

(b)

**Supplementary Figure S1.** Growth of *Chlamydomonas* sp. MACC-216 (a) and *Chlorella* sp. MACC-360 (b) under various concentrations of nitrate in TAP medium. Error bars are representing standard deviations.
